# Supplementary material for: Cost-Effectiveness of Icosapent Ethyl, Evolocumab, Alirocumab, Ezetimibe, or Fenofibrate in Combination with Statins Compared to Statin Monotherapy
Source: PubMed Central journal article supplement — Clin Drug Investig. 2022 Jul 11;42(8):643–56. doi: 10.1007/s40261-022-01173-3 (PMC9338124; doi:10.1007/s40261-022-01173-3), 2022-07-11
Supplement: 40261_2022_1173_MOESM1_ESM.pdf [file 40261_2022_1173_MOESM1_ESM.pdf]

## Supplementary Online Content

### *Clinical Drug Investigation*

Cost-Effectiveness of Icosapent Ethyl, Evolocumab, Alirocumab, Ezetimibe, or Fenofibrate in Combination with Statins Compared to Statin Monotherapy. DT Michaeli, JC Michaeli, T Boch, T Michaeli.

- Table e1** Characteristics of cardiovascular outcome trials for additive lipid-modifying agents
- Table e2** Transition probabilities
- Table e3** Scenario analysis
- Figure e1** Cost-effectiveness plane for ezetimibe, evolocumab, alirocumab, icosapent ethyl, and fenofibrate in combination with statins for primary and secondary cardiovascular prevention by life years gained
- Figure e2** Univariate sensitivity analysis for primary cardiovascular prevention: tornado plots
- Figure e3** Univariate sensitivity analysis for secondary cardiovascular prevention: tornado plots
- Figure e4** Incremental cost-effectiveness ratios as a function of the annual treatment cost at a willingness-to-pay threshold of £30,000 per QALY

This supplementary material has been provided by the authors to give readers additional information about their work.

|                        | Cholesterol-Lowering Strategy |                                                   |                                                     | Triglyceride-Lowering Strategy                                           |                           |
|------------------------|-------------------------------|---------------------------------------------------|-----------------------------------------------------|--------------------------------------------------------------------------|---------------------------|
|                        | Ezetimibe                     | Evolocuma                                         | Alirocumab                                          | Icosapent Ethyl                                                          | Fenofibrate               |
| Name                   | IMPROVE-IT                    | FOURIER                                           | ODYSSEY                                             | REDUCE-IT                                                                | ACCORD                    |
| Reference              | [1]                           | [2]                                               | [3]                                                 | [4]                                                                      | [5]                       |
| Start date             | 2005                          | 2012                                              | 2012                                                | 2011                                                                     | 2001                      |
| Size                   | 18,144 patients               | 27,564 patients                                   | 18,924 patients                                     | 8,179 patients                                                           | 5,518 patients            |
| Design                 | Placebo-controlled (1:1)      | Placebo-controlled (1:1)                          | Placebo-controlled (1:1)                            | Placebo-controlled (1:1)                                                 | Placebo-controlled (1:1)  |
| Randomization          | Randomized                    | Randomized                                        | Randomized                                          | Randomized                                                               | Randomized                |
| Blinding               | Double-blind                  | Double-blind                                      | Double-blind                                        | Double-blind                                                             | Double-blind              |
| Median age             | 64 years                      | 63 years                                          | 58 years                                            | 64 years                                                                 | 62 years                  |
| Median follow-up       | 6 years                       | 2.2 years                                         | 2.8 years                                           | 4.9 years                                                                | 4.7 years                 |
| Primary endpoint       | MACE                          | MACE                                              | MACE                                                | MACE                                                                     | MACE                      |
| Treatment              | 10 mg daily (p.o)             | 140 mg biweekly or<br>420 mg monthly (s.c.)       | 75 mg biweekly (s.c.)                               | 2 g bi-daily (p.o.)                                                      | 160 mg daily (p.o.)       |
| Baseline therapy       | Statin                        | Statin                                            | Statin                                              | Statin                                                                   | Statin                    |
| Intensity (% patients) | Moderate-Intensity (100%)     | High-Intensity (69%),<br>Moderate-Intensity (31%) | High-Intensity (100%)                               | High-Intensity (31%),<br>Moderate-Intensity (62%),<br>Low-Intensity (6%) | Moderate-Intensity (100%) |
| Agent (dose per day)   | Simvastatin (40 mg)           | NR                                                | Atorvastatin (40-80 mg),<br>Rosuvastatin (20-40 mg) | NR                                                                       | Simvastatin (20-40 mg)    |

**Table e1** Characteristics of cardiovascular outcome trials evaluating for lipid-modifying agents

*CVOT* cardiovascular outcome trial, *MACE* major adverse cardiovascular event, *NR* not reported.

|                                     | <b>Icosapent Ethyl</b> |        | <b>Evolocumab</b>  |        | <b>Alirocumab</b>  |        | <b>Ezetimibe</b>   |        | <b>Fenofibrate</b> |        |
|-------------------------------------|------------------------|--------|--------------------|--------|--------------------|--------|--------------------|--------|--------------------|--------|
|                                     | Statin + Treatment     | Statin | Statin + Treatment | Statin | Statin + Treatment | Statin | Statin + Treatment | Statin | Statin + Treatment | Statin |
| <b>Primary Prevention</b>           |                        |        |                    |        |                    |        |                    |        |                    |        |
| Non-fatal MI                        | 0.0121                 | 0.0154 | a                  | a      | a                  | a      | a                  | a      | 0.0094             | 0.0096 |
| CVD death                           | 0.0064                 | 0.0071 | a                  | a      | a                  | a      | a                  | a      | 0.0053             | 0.0058 |
| Non-CVD death                       | 0.0037                 | 0.0032 | a                  | a      | a                  | a      | a                  | a      | 0.0056             | 0.0055 |
| Non-fatal stroke                    | 0.0036                 | 0.0045 | a                  | a      | a                  | a      | a                  | a      | 0.0027             | 0.0024 |
| Hospitalization for unstable angina | 0.0040                 | 0.0052 | a                  | a      | a                  | a      | a                  | a      | 0.0081             | 0.0078 |
| Coronary revascularization          | 0.0142                 | 0.0187 | a                  | a      | a                  | a      | a                  | a      | 0.0297             | 0.0282 |
| <b>Secondary Prevention</b>         |                        |        |                    |        |                    |        |                    |        |                    |        |
| Non-fatal MI                        | 0.0187                 | 0.0274 | 0.0148             | 0.0205 | 0.0244             | 0.0283 | 0.0183             | 0.0212 | 0.0215             | 0.0244 |
| CVD death                           | 0.0099                 | 0.0125 | 0.0084             | 0.0080 | 0.0092             | 0.0104 | 0.0102             | 0.0102 | 0.0120             | 0.0146 |
| Non-CVD death                       | 0.0056                 | 0.0056 | 0.0064             | 0.0062 | 0.0036             | 0.0046 | 0.0130             | 0.0132 | 0.0127             | 0.0137 |
| Non-fatal stroke                    | 0.0055                 | 0.0078 | 0.0058             | 0.0064 | 0.0042             | 0.0058 | 0.0055             | 0.0065 | 0.0061             | 0.0060 |
| Hospitalization for unstable angina | 0.0061                 | 0.0091 | 0.0078             | 0.0080 | 0.0014             | 0.0023 | 0.0029             | 0.0027 | 0.0185             | 0.0196 |
| Coronary revascularization          | 0.0220                 | 0.0336 | 0.0257             | 0.0330 | 0.0287             | 0.0327 | 0.0385             | 0.0406 | 0.0727             | 0.0775 |

**Table e2** Transition probabilities

Hazard ratios were obtained from RCT reporting MACE endpoints for each treatment option to calculate transition probabilities for the incidence of acute cardiovascular events and death: Icosapent ethyl (REDUCE-IT), evolocumab (FOURIER), alirocumab (ODYSSEY), ezetimibe (IMPROVE-IT), and fenofibrate (ACCORD) [1–5]. Adopted from Michaeli et al. (2020) [6]. *CVD* cardiovascular disease, *MACE* major adverse cardiovascular event, *MI* myocardial infarct, *RCT* randomized controlled trial.

<sup>a</sup> No clinical trial reporting major cardiovascular adverse events for patients without established CVD was available for ezetimibe, evolocumab, and alirocumab.

Cost-Effectiveness of Lipid-Modifying Drugs

| Scenario                     | Primary Prevention |             | Secondary Prevention |            |            |           |             |
|------------------------------|--------------------|-------------|----------------------|------------|------------|-----------|-------------|
|                              | Icosapent Ethyl    | Fenofibrate | Icosapent Ethyl      | Evolocumab | Alirocumab | Ezetimibe | Fenofibrate |
| Annual treatment cost        |                    |             |                      |            |            |           |             |
| Base case                    | 19,485             | -9,932      | 13,317               | 85,193     | 54,211     | -4,231    | -7,472      |
| -50%                         | 2,546              | -11,383     | 792                  | 33,303     | 21,616     | -7,463    | -8,376      |
| +50%                         | 36,424             | -8,480      | 25,842               | 137,082    | 86,806     | -998      | -6,568      |
| Discount rate                |                    |             |                      |            |            |           |             |
| 3.5% (Base case)             | 19,485             | -9,932      | 13,317               | 85,193     | 54,211     | -4,231    | -7,472      |
| 2.0%                         | 16,141             | -10,178     | 11,196               | 74,008     | 48,011     | -4,702    | -7,491      |
| 5.0%                         | 23,330             | -9,634      | 15,715               | 98,142     | 61,206     | -3,673    | -7,433      |
| Yearly CVD risk increase     |                    |             |                      |            |            |           |             |
| +14% (Base Case)             | 19,485             | -9,932      | 13,317               | 85,193     | 54,211     | -4,231    | -7,472      |
| +12%                         | 29,839             | -7,386      | 18,423               | 117,177    | 68,895     | -1,457    | -5,951      |
| +16%                         | 12,290             | -11,709     | 9,321                | 62,451     | 42,670     | -6,358    | -8,604      |
| Yearly non-CVD risk increase |                    |             |                      |            |            |           |             |
| +10% (Base Case)             | 19,485             | -9,932      | 13,285               | 85,193     | 54,211     | -4,231    | -7,472      |
| +8%                          | 19,675             | -11,382     | 13,233               | 89,681     | 55,573     | -5,725    | -8,713      |
| +12%                         | 19,186             | -8,314      | 13,317               | 79,801     | 52,550     | -2,694    | -6,085      |

**Table e3** Scenario analysis

ICER (£ per QALY) are presented under different modelling scenarios. Costs in 2021 Great Britain Pounds (£). *CVD* cardiovascular disease, *ICER* incremental cost-effectiveness ratio, *QALY* quality-adjusted life year.

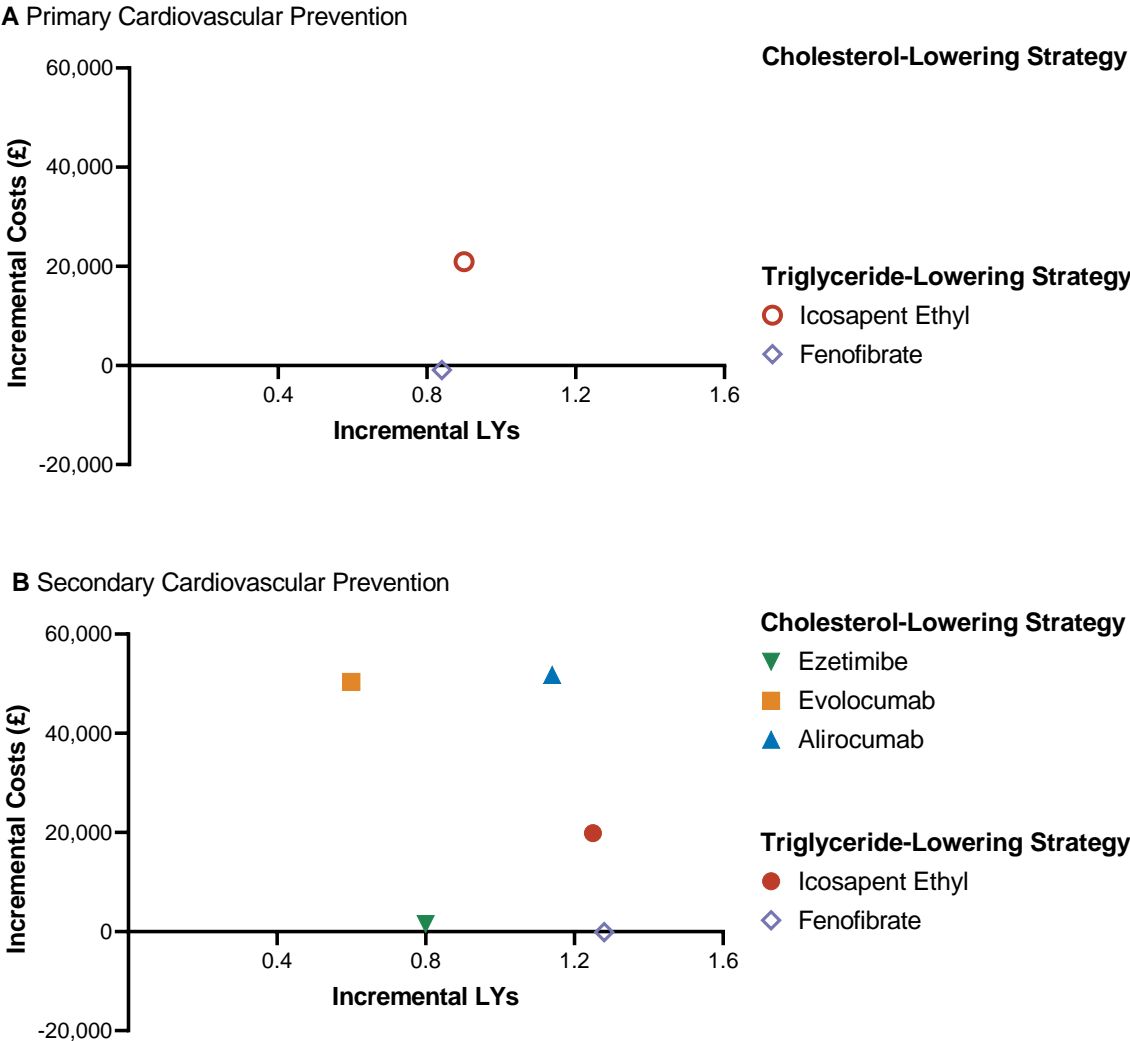

**Figure e1** Cost-effectiveness plane for ezetimibe, evolocumab, alirocumab, icosapent ethyl, and fenofibrate in combination with statins for primary (A) and secondary (B) cardiovascular prevention by life years gained

QALYs and costs presented for the average person simulated in the model. Lipid-lowering drugs are presented as cholesterol- and triglyceride-lowering according to guideline recommendations.[7] Costs in 2021 Great Britain Pounds (£). LY life year.

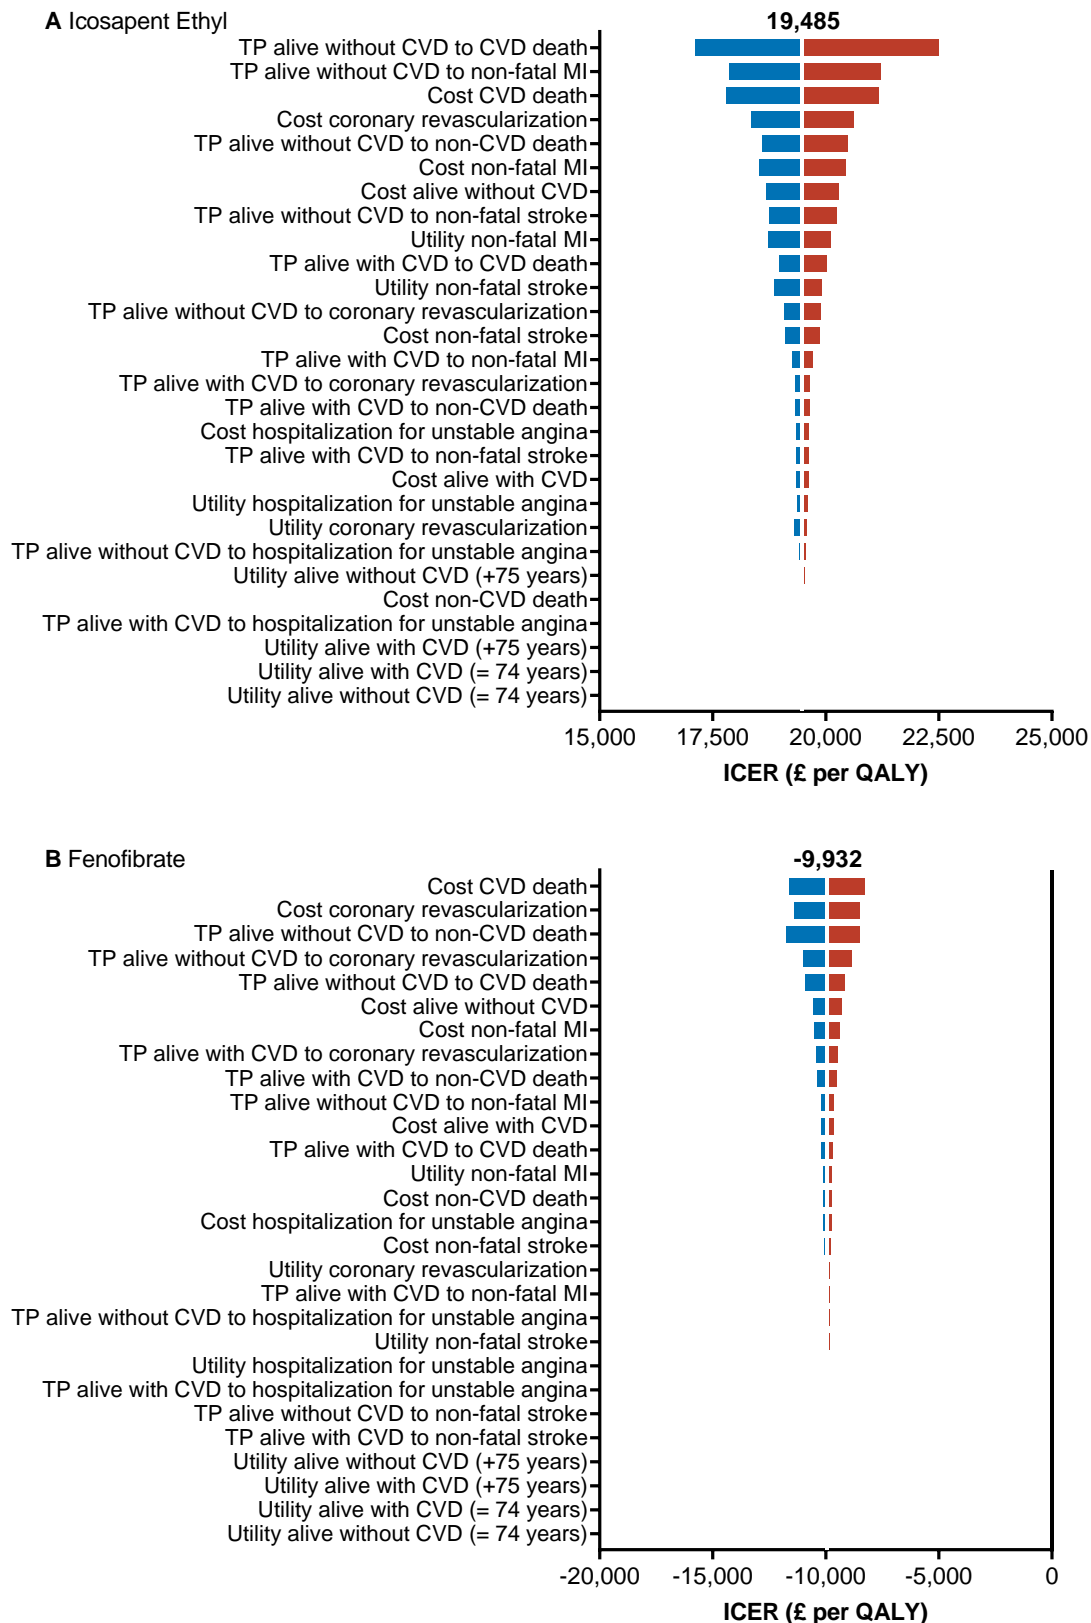

**Figure e2** Univariate sensitivity analysis for primary cardiovascular prevention: tornado plots

Results displayed for icosapent ethyl (A) and fenofibrate (B). Graphs visualize the variation of input parameters by their confidence intervals presented in Table 1. Costs in 2021 Great Britain Pounds (£). CVD cardiovascular disease, ICER incremental cost-effectiveness ratio, MI myocardial infarct, TP transition probability.

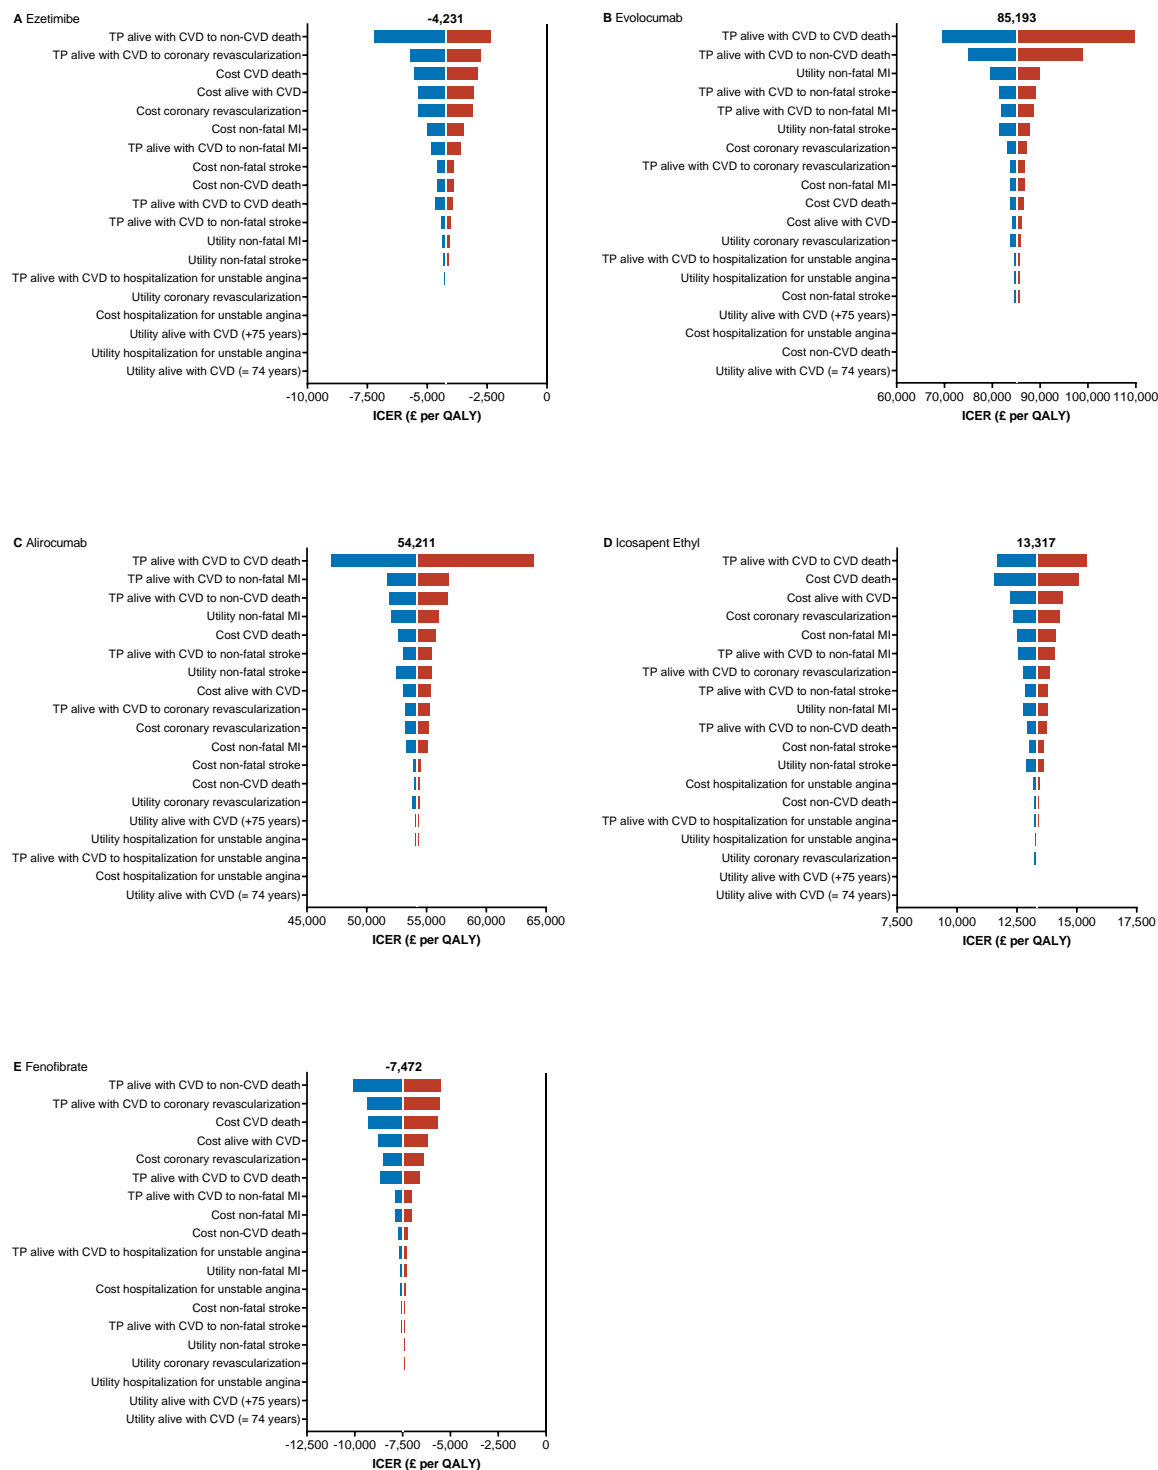

**Figure e3** Univariate sensitivity analysis for secondary cardiovascular prevention: tornado plots

Results displayed for ezetimibe (A), evolocumab (B), alirocumab (C), icosapent ethyl (D), and fenofibrate (E). Graphs visualize the variation of input parameters by their confidence intervals presented in Table 1. Costs in 2021 Great Britain Pounds (£). CVD cardiovascular disease, ICER incremental cost-effectiveness ratio, MI myocardial infarct, TP transition probability.

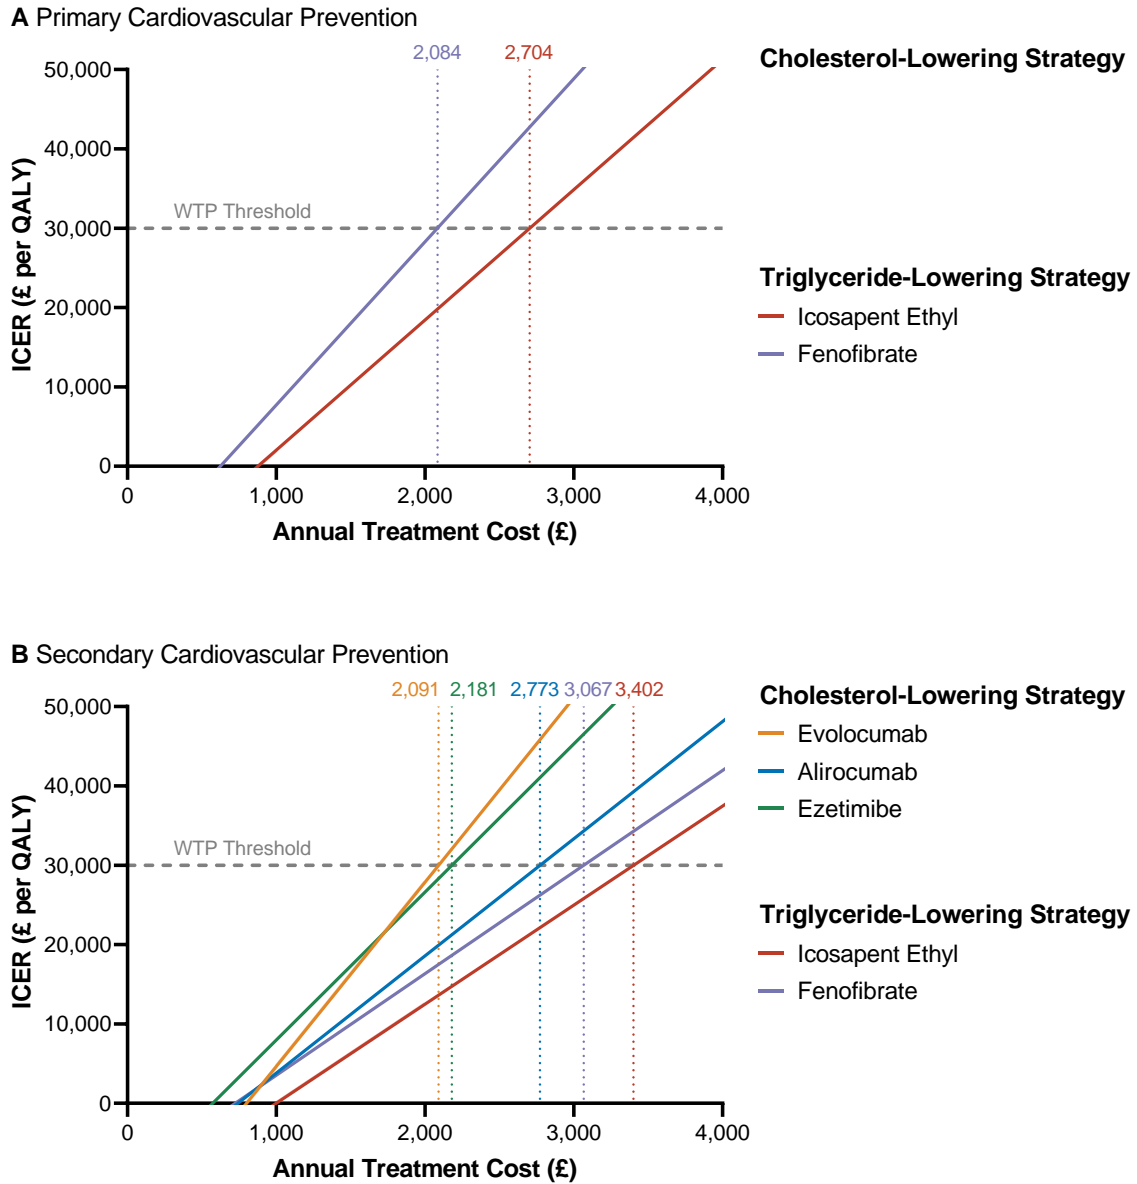

**Figure e4** Incremental cost-effectiveness ratios as a function of the annual treatment cost at a willingness-to-pay threshold of £30,000 per QALY

QALYs and costs presented for the average person simulated in the model. Lipid-lowering drugs are presented as cholesterol- and triglyceride-lowering according to guideline recommendations.[7] Costs in 2021 Great Britain Pounds (£). *ICER* incremental cost-effectiveness ratio, *QALY* quality-adjusted life year.



## **References**

1. Cannon CP, Blazing MA, Giugliano RP, McCagg A, White JA, Theroux P, et al. Ezetimibe Added to Statin Therapy after Acute Coronary Syndromes. *N Engl J Med. Massachusetts Medical Society*; 2015;372:2387–97.
2. Sabatine MS, Giugliano RP, Keech AC, Honarpour N, Wiviott SD, Murphy SA, et al. Evolocumab and Clinical Outcomes in Patients with Cardiovascular Disease. *N Engl J Med. Massachusetts Medical Society*; 2017;376:1713–22.
3. Schwartz GG, Steg PG, Szarek M, Bhatt DL, Bittner VA, Diaz R, et al. Alirocumab and Cardiovascular Outcomes after Acute Coronary Syndrome. *N Engl J Med. Massachusetts Medical Society*; 2018;379:2097–107.
4. Bhatt DL, Steg PG, Miller M, Brinton EA, Jacobson TA, Ketchum SB, et al. Cardiovascular Risk Reduction with Icosapent Ethyl for Hypertriglyceridemia. *N Engl J Med. Massachusetts Medical Society*; 2019;380:11–22.
5. ACCORD Study Group, Ginsberg HN, Elam MB, Lovato LC, Crouse JR, Leiter LA, et al. Effects of combination lipid therapy in type 2 diabetes mellitus. *N Engl J Med. 2010;362:1563–74.*
6. Michaeli DT, Michaeli JC, Boch T, Michaeli T. Cost-Effectiveness of Lipid-Lowering Therapies for Cardiovascular Prevention in Germany. *Cardiovasc Drugs Ther. 2022.*
7. Mach F, Baigent C, Catapano AL, Koskinas KC, Casula M, Badimon L, et al. 2019 ESC/EAS Guidelines for the management of dyslipidaemias: lipid modification to reduce cardiovascular risk: The Task Force for the management of dyslipidaemias of the European Society of Cardiology (ESC) and European Atherosclerosis Society (EAS). *Eur Heart J. 2020;41:111–88.*
